# Supplementary material for: Healthcare workers’ views on mandatory SARS-CoV-2 vaccination in the United Kingdom: findings from the UK-REACH prospective longitudinal cohort study
Source: bioRxiv or medRxiv preprint supplement (doi:10.1101/2022.01.11.22269017), 2022-01-11
Supplement: Supplementary file [file media-1.pdf]

**Supplementary Table 1. Description of the cohort stratified by coded response to the free text question and selected predictors**

| Variable                | Total         | Code              |                                         |                       |                                        |                                                   |                                                                                  |                  | P value† |
|-------------------------|---------------|-------------------|-----------------------------------------|-----------------------|----------------------------------------|---------------------------------------------------|----------------------------------------------------------------------------------|------------------|----------|
|                         |               | Do nothing        | Educate, increase access or incentivise | Maintain restrictions | Specific restrictions for unvaccinated | Mandatory vaccination for HCW / social care staff | Mandatory vaccination for general population or limited access to vital services | Don't know       |          |
|                         | <b>N=3235</b> | <b>580 (17.9)</b> | <b>1047 (32.4)</b>                      | <b>336 (10.4)</b>     | <b>547 (16.9)</b>                      | <b>201 (6.2)</b>                                  | <b>377 (11.7)</b>                                                                | <b>147 (4.5)</b> |          |
| <b>Age, med(IQR)</b>    | 46 (35 – 55)  | 46 (36 – 56)      | 48 (38 – 56)                            | 41 (32 – 52)          | 46 (35 – 56)                           | 54 (46 – 61)                                      | 49 (38 – 57.5)                                                                   | 46 (35 – 56)     | <0.001   |
| Missing                 | 13 (0.4)      | 6 (1.0)           | 2 (0.2)                                 | 0 (0.0)               | 2 (0.4)                                | 2 (1.0)                                           | 1 (0.3)                                                                          | 0 (0.0)          |          |
| <b>Sex</b>              |               |                   |                                         |                       |                                        |                                                   |                                                                                  |                  |          |
| Male                    | 824 (25.5)    | 132 (22.8)        | 292 (27.9)                              | 65 (19.4)             | 138 (25.2)                             | 43 (21.4)                                         | 128 (34.0)                                                                       | 26 (17.7)        | <0.001   |
| Female                  | 2405 (74.3)   | 445 (76.7)        | 754 (72.0)                              | 271 (80.7)            | 408 (74.6)                             | 158 (78.6)                                        | 248 (65.8)                                                                       | 121 (82.3)       |          |
| Missing                 | 6 (0.2)       | 3 (0.5)           | 1 (0.1)                                 | 0 (0.0)               | 1 (0.2)                                | 0 (0.0)                                           | 1 (0.3)                                                                          | 0 (0.0)          |          |
| <b>Ethnicity</b>        |               |                   |                                         |                       |                                        |                                                   |                                                                                  |                  |          |
| White                   | 2336 (72.2)   | 444 (76.6)        | 688 (65.7)                              | 231 (68.8)            | 411 (75.1)                             | 170 (84.6)                                        | 275 (72.9)                                                                       | 117 (79.6)       | <0.001   |
| Asian                   | 571 (17.7)    | 78 (13.5)         | 236 (22.5)                              | 71 (21.1)             | 84 (15.4)                              | 16 (8.0)                                          | 70 (18.6)                                                                        | 16 (10.9)        |          |
| Black                   | 122 (3.8)     | 28 (4.8)          | 52 (5.0)                                | 10 (3.0)              | 16 (2.9)                               | 3 (1.5)                                           | 9 (2.4)                                                                          | 4 (2.7)          |          |
| Mixed                   | 144 (4.5)     | 26 (4.5)          | 47 (4.5)                                | 15 (4.5)              | 27 (4.9)                               | 7 (3.5)                                           | 16 (4.2)                                                                         | 6 (4.1)          |          |
| Other                   | 60 (1.9)      | 3 (0.5)           | 24 (2.3)                                | 9 (2.7)               | 9 (1.7)                                | 5 (2.5)                                           | 7 (1.9)                                                                          | 3 (2.0)          |          |
| Missing                 | 2 (0.1)       | 1 (0.2)           | 0 (0.0)                                 | 0 (0.0)               | 0 (0.0)                                | 0 (0.0)                                           | 0 (0.0)                                                                          | 1 (0.7)          |          |
| <b>Migration status</b> |               |                   |                                         |                       |                                        |                                                   |                                                                                  |                  |          |
| Born in the UK          | 2356 (72.8)   | 447 (77.1)        | 709 (67.7)                              | 233 (69.4)            | 424 (77.5)                             | 164 (81.6)                                        | 267 (70.8)                                                                       | 112 (76.2)       | <0.001   |
| Born outside the UK     | 791 (24.5)    | 120 (20.7)        | 306 (29.2)                              | 91 (27.1)             | 114 (20.8)                             | 33 (16.4)                                         | 101 (26.8)                                                                       | 26 (17.7)        |          |
| Missing                 | 88 (2.7)      | 13 (2.2)          | 32 (3.1)                                | 12 (3.6)              | 9 (1.7)                                | 4 (2.0)                                           | 9 (2.4)                                                                          | 9 (6.1)          |          |
| <b>IMD quintile</b>     |               |                   |                                         |                       |                                        |                                                   |                                                                                  |                  |          |
| 1 (most deprived)       | 275 (8.5)     | 55 (9.5)          | 88 (8.4)                                | 42 (12.5)             | 33 (6.0)                               | 9 (4.5)                                           | 36 (9.6)                                                                         | 12 (8.2)         | 0.002    |
| 2                       | 472 (14.6)    | 102 (17.6)        | 147 (14.0)                              | 53 (15.8)             | 60 (11.0)                              | 29 (14.4)                                         | 55 (14.6)                                                                        | 26 (17.7)        |          |
| 3                       | 588 (18.2)    | 99 (17.1)         | 193 (18.4)                              | 59 (17.6)             | 96 (17.6)                              | 36 (17.9)                                         | 78 (20.7)                                                                        | 27 (18.4)        |          |
| 4                       | 727 (22.5)    | 117 (20.2)        | 243 (23.2)                              | 78 (23.2)             | 136 (24.9)                             | 36 (17.9)                                         | 84 (22.3)                                                                        | 33 (22.5)        |          |
| 5 (least deprived)      | 808 (25.0)    | 124 (21.4)        | 283 (27.0)                              | 67 (19.9)             | 149 (27.2)                             | 68 (33.8)                                         | 86 (22.8)                                                                        | 31 (21.1)        |          |

|                                                                             |              |              |              |              |              |              |              |              |        |
|-----------------------------------------------------------------------------|--------------|--------------|--------------|--------------|--------------|--------------|--------------|--------------|--------|
| Missing                                                                     | 365 (11.3)   | 83 (14.3)    | 93 (8.9)     | 37 (11.0)    | 73 (13.4)    | 23 (11.4)    | 38 (10.1)    | 18 (12.2)    |        |
| <b>Job role</b>                                                             |              |              |              |              |              |              |              |              |        |
| Medical                                                                     | 773 (23.9)   | 95 (16.4)    | 301 (28.8)   | 63 (18.8)    | 133 (24.3)   | 55 (27.4)    | 99 (26.3)    | 27 (18.4)    | <0.001 |
| Nursing (inc Midwives + HCAs)                                               | 698 (21.6)   | 139 (24.0)   | 196 (18.7)   | 75 (22.3)    | 115 (21.0)   | 52 (25.9)    | 82 (21.8)    | 39 (26.5)    |        |
| AHPs*                                                                       | 1303 (40.3)  | 247 (42.6)   | 416 (39.7)   | 155 (46.1)   | 218 (39.9)   | 65 (32.3)    | 135 (35.8)   | 67 (45.6)    |        |
| Dental                                                                      | 173 (5.4)    | 38 (6.6)     | 45 (4.3)     | 21 (6.3)     | 27 (4.9)     | 14 (7.0)     | 22 (5.8)     | 6 (4.1)      |        |
| Administrative/estates/other                                                | 195 (6.0)    | 42 (7.2)     | 58 (5.5)     | 16 (4.8)     | 39 (7.1)     | 10 (5.0)     | 24 (6.4)     | 6 (4.1)      |        |
| Missing                                                                     | 93 (2.9)     | 19 (3.3)     | 31 (3.0)     | 6 (1.8)      | 15 (2.7)     | 5 (2.4)      | 15 (4.0)     | 2 (1.4)      |        |
| <b>Exposure to patients with COVID-19 (at time of second questionnaire)</b> |              |              |              |              |              |              |              |              |        |
| No contact/remote contact only                                              | 2518 (77.8)  | 458 (79.0)   | 809 (77.3)   | 249 (74.1)   | 431 (78.8)   | 165 (82.1)   | 291 (77.2)   | 115 (78.2)   | 0.26   |
| Face to face but no physical contact                                        | 149 (4.6)    | 29 (5.0)     | 59 (5.6)     | 19 (5.7)     | 23 (4.2)     | 6 (3.0)      | 11 (2.9)     | 2 (1.4)      |        |
| Physical contact                                                            | 377 (11.7)   | 68 (11.7)    | 116 (11.1)   | 43 (12.8)    | 65 (11.9)    | 16 (8.0)     | 49 (13.0)    | 20 (13.6)    |        |
| missing                                                                     | 191 (5.9)    | 25 (4.3)     | 63 (6.0)     | 25 (7.4)     | 28 (5.1)     | 14 (7.0)     | 26 (6.9)     | 10 (6.8)     |        |
| <b>SARS-CoV-2 vaccine hesitancy</b>                                         |              |              |              |              |              |              |              |              |        |
| Not hesitant                                                                | 2239 (69.2)  | 333 (57.4)   | 750 (71.6)   | 206 (61.3)   | 412 (75.3)   | 174 (86.6)   | 285 (75.6)   | 79 (53.7)    | <0.001 |
| Hesitant                                                                    | 862 (26.7)   | 236 (40.7)   | 244 (23.3)   | 112 (33.3)   | 116 (21.2)   | 20 (10.0)    | 78 (20.7)    | 56 (38.1)    |        |
| Missing                                                                     | 134 (4.1)    | 11 (1.9)     | 53 (5.1)     | 18 (5.4)     | 19 (3.5)     | 7 (3.5)      | 14 (3.7)     | 12 (8.2)     |        |
| <b>Number of influenza vaccines in previous 2 seasons</b>                   |              |              |              |              |              |              |              |              |        |
| 0                                                                           | 456 (14.1)   | 119 (20.5)   | 142 (13.6)   | 48 (14.3)    | 64 (11.7)    | 16 (8.0)     | 43 (11.4)    | 24 (16.3)    | <0.001 |
| 1                                                                           | 515 (15.9)   | 100 (17.2)   | 174 (16.6)   | 54 (16.1)    | 84 (15.4)    | 30 (14.9)    | 57 (15.1)    | 16 (10.9)    |        |
| 2                                                                           | 2123 (65.6)  | 342 (59.0)   | 682 (65.1)   | 218 (64.9)   | 382 (69.8)   | 147 (73.1)   | 259 (68.7)   | 93 (63.3)    |        |
| Missing                                                                     | 141 (4.4)    | 19 (3.3)     | 49 (4.7)     | 16 (4.8)     | 17 (3.1)     | 8 (4.0)      | 18 (4.8)     | 18 (4.8)     |        |
| <b>VAX score, med (IQR)</b>                                                 | 16 (14 – 17) | 15 (13 – 17) | 16 (14 – 17) | 15 (13 – 17) | 16 (15 – 17) | 16 (15 – 18) | 16 (14 – 18) | 16 (13 – 17) | <0.001 |
| Missing                                                                     | 0 (0.0)      | 0 (0.0)      | 0 (0.0)      | 0 (0.0)      | 0 (0.0)      | 0 (0.0)      | 0 (0.0)      | 0 (0.0)      |        |
| <b>Number of comorbidities</b>                                              |              |              |              |              |              |              |              |              |        |
| 0                                                                           | 2465 (76.2)  | 451 (77.8)   | 810 (77.4)   | 258 (76.8)   | 412 (75.3)   | 147 (73.1)   | 285 (75.6)   | 102 (69.4)   | 0.9    |
| ≥1                                                                          | 249 (7.7)    | 43 (7.4)     | 78 (7.5)     | 27 (8.0)     | 41 (7.5)     | 20 (10.0)    | 28 (7.4)     | 12 (8.2)     |        |
| Missing                                                                     | 521 (16.1)   | 86 (14.8)    | 159 (15.2)   | 51 (15.2)    | 94 (17.2)    | 34 (16.9)    | 64 (17.0)    | 33 (22.5)    |        |
| <b>Pregnant<sup>‡</sup></b>                                                 |              |              |              |              |              |              |              |              |        |
| Not pregnant                                                                | 2947 (91.1)  | 539 (92.9)   | 938 (89.6)   | 301 (89.6)   | 505 (92.3)   | 187 (93.0)   | 350 (92.8)   | 127 (86.4)   | 0.16   |

|                                                                                          |             |            |            |            |            |            |            |            |        |
|------------------------------------------------------------------------------------------|-------------|------------|------------|------------|------------|------------|------------|------------|--------|
| Pregnant                                                                                 | 63 (2.0)    | 12 (2.1)   | 20 (1.9)   | 12 (3.6)   | 12 (2.2)   | 3 (1.5)    | 2 (0.5)    | 2 (1.4)    |        |
| Missing                                                                                  | 225 (7.0)   | 29 (5.0)   | 89 (8.5)   | 23 (6.9)   | 30 (5.5)   | 11 (5.5)   | 25 (6.6)   | 18 (12.2)  |        |
| <b>Previous COVID-19</b>                                                                 |             |            |            |            |            |            |            |            |        |
| Never tested                                                                             | 278 (8.6)   | 55 (9.5)   | 99 (9.5)   | 31 (9.2)   | 37 (6.8)   | 21 (10.5)  | 28 (7.4)   | 7 (4.8)    | 0.22   |
| Tested negative                                                                          | 2181 (67.4) | 380 (65.5) | 708 (67.6) | 238 (70.8) | 376 (68.7) | 127 (63.2) | 256 (67.9) | 96 (65.3)  |        |
| Tested positive                                                                          | 763 (23.6)  | 141 (24.3) | 237 (22.6) | 65 (19.4)  | 133 (24.3) | 51 (25.4)  | 92 (24.4)  | 44 (29.9)  |        |
| Missing                                                                                  | 13 (0.4)    | 4 (0.7)    | 3 (0.3)    | 2 (0.6)    | 1 (0.2)    | 2 (1.0)    | 1 (0.3)    | 0 (0.0)    |        |
| <b>Lives with a person ≥65 years old</b>                                                 |             |            |            |            |            |            |            |            |        |
| No                                                                                       | 2808 (86.8) | 510 (87.9) | 902 (86.2) | 294 (87.5) | 483 (88.3) | 166 (82.6) | 328 (87.0) | 125 (85.0) | 0.25   |
| Yes                                                                                      | 320 (9.9)   | 56 (9.7)   | 108 (10.3) | 29 (8.6)   | 52 (9.5)   | 30 (14.9)  | 35 (9.3)   | 10 (6.8)   |        |
| Missing                                                                                  | 107 (3.3)   | 14 (2.4)   | 37 (3.5)   | 13 (3.9)   | 12 (2.2)   | 5 (2.5)    | 14 (3.7)   | 12 (8.2)   |        |
| <b>Lives with other key workers</b>                                                      |             |            |            |            |            |            |            |            |        |
| No                                                                                       | 1678 (51.9) | 287 (49.5) | 560 (53.5) | 168 (50.0) | 283 (51.7) | 118 (58.7) | 182 (48.3) | 80 (54.4)  | 0.05   |
| Yes                                                                                      | 1444 (44.6) | 279 (48.1) | 450 (43.0) | 155 (46.1) | 250 (45.7) | 74 (36.8)  | 183 (48.5) | 53 (36.1)  |        |
| Missing                                                                                  | 113 (3.5)   | 14 (2.4)   | 37 (3.5)   | 13 (3.9)   | 14 (2.6)   | 9 (4.5)    | 12 (3.2)   | 14 (9.5)   |        |
| <b>Trusts employing organisation to deal with concern about unsafe clinical practice</b> |             |            |            |            |            |            |            |            |        |
| Does not trust organisation                                                              | 844 (26.1)  | 165 (28.5) | 248 (23.7) | 88 (26.2)  | 149 (27.2) | 45 (22.4)  | 116 (30.8) | 33 (22.5)  | 0.07   |
| Trusts organisation                                                                      | 2161 (66.8) | 384 (66.2) | 724 (69.2) | 223 (66.4) | 361 (66.0) | 138 (68.7) | 230 (61.0) | 101 (68.7) |        |
| Missing                                                                                  | 230 (7.1)   | 31 (5.3)   | 75 (7.2)   | 25 (7.4)   | 37 (6.8)   | 18 (9.0)   | 31 (8.2)   | 13 (8.8)   |        |
| <b>COVID-19 conspiracies score, med (IQR)</b>                                            | 8 (7 – 10)  | 9 (8 – 11) | 8 (7 – 10) | 9 (8 – 10) | 8 (7 – 10) | 8 (7 – 9)  | 9 (7 – 10) | 9 (8 – 10) | <0.001 |
| Missing                                                                                  | 128 (4.0)   | 17 (2.9)   | 44 (4.2)   | 16 (4.8)   | 16 (2.9)   | 6 (3.0)    | 15 (4.0)   | 14 (9.5)   |        |

Also includes pharmacists, healthcare scientists, ambulance workers and those in optical roles. † groups compared using chi-squared tests for categorical variables and Kruskal-Wallis tests for continuous variables. Values expressed as n(%) unless stated otherwise. ‡ Participants are coded as pregnant if they indicated they were pregnant at baseline or at follow up (i.e. this category includes participants who were pregnant at baseline and who may have delivered by the time of completing the follow up questionnaire. IMD – index of multiple deprivation; IQR – interquartile range;
