# Supplementary material for: Healthcare workers’ views on mandatory SARS-CoV-2 vaccination in the United Kingdom: findings from the UK-REACH prospective longitudinal cohort study
Source: bioRxiv or medRxiv preprint supplement (doi:10.1101/2022.01.11.22269017), 2022-01-11
Supplement: Supplementary file [file media-2.pdf]

**Supplementary Table 2. Comparing demographic and occupational characteristics of free text responders and non-responders**

|                               | <b>Total<br/>N=5633</b> | <b>Responders<br/>N=3235</b> | <b>Non-responders<br/>N=2398</b> | <b>P value*</b> |
|-------------------------------|-------------------------|------------------------------|----------------------------------|-----------------|
| <b>Age, med(IQR)</b>          | 46 (35 – 55)            | 47 (36 – 56)                 | 43 (34 – 53)                     | <0.001          |
| <b>Sex</b>                    |                         |                              |                                  |                 |
| Male                          | 1411 (25.1)             | 824 (25.5)                   | 587 (24.5)                       | 0.38            |
| Female                        | 4215 (74.8)             | 2405 (74.3)                  | 1810 (75.5)                      |                 |
| Missing                       | 7 (0.1)                 | 6 (0.2)                      | 1 (0.0)                          |                 |
| <b>Ethnicity</b>              |                         |                              |                                  |                 |
| White                         | 4,106 (72.9)            | 2336 (72.2)                  | 1770 (73.8)                      | 0.32            |
| Asian                         | 984 (17.5)              | 571 (17.7)                   | 413 (17.2)                       |                 |
| Black                         | 197 (3.5)               | 122 (3.8)                    | 75 (3.1)                         |                 |
| Mixed                         | 236 (4.2)               | 144 (4.5)                    | 92 (3.8)                         |                 |
| Other                         | 103 (1.8)               | 60 (1.9)                     | 43 (1.8)                         |                 |
| Missing                       | 7 (0.1)                 | 2 (0.1)                      | 5 (0.2)                          |                 |
| <b>Job role</b>               |                         |                              |                                  |                 |
| Medical                       | 1365 (24.2)             | 778 (24.1)                   | 587 (24.5)                       | 0.22            |
| Nursing (inc Midwives + HCAs) | 1160 (20.6)             | 698 (21.6)                   | 462 (19.3)                       |                 |
| AHPs                          | 2277 (40.4)             | 1301 (40.2)                  | 976 (40.7)                       |                 |
| Dental                        | 325 (5.8)               | 171 (5.3)                    | 154 (6.4)                        |                 |
| Administrative/estates/other  | 321 (5.7)               | 184 (5.7)                    | 137 (5.7)                        |                 |
| Missing                       | 185 (3.3)               | 103 (3.2)                    | 82 (3.4)                         |                 |

\* Responders and non-responders compared using chi-squared tests for categorical variables and Wilcoxon rank-sum tests for continuous variables. Values expressed as n(%) unless stated otherwise.
